# Supplementary material
Source: PubMed Central journal article supplement (PMC9927253)
Supplement: spectrum.02286-22-s0001.pdf [file spectrum.02286-22-s0001.pdf]

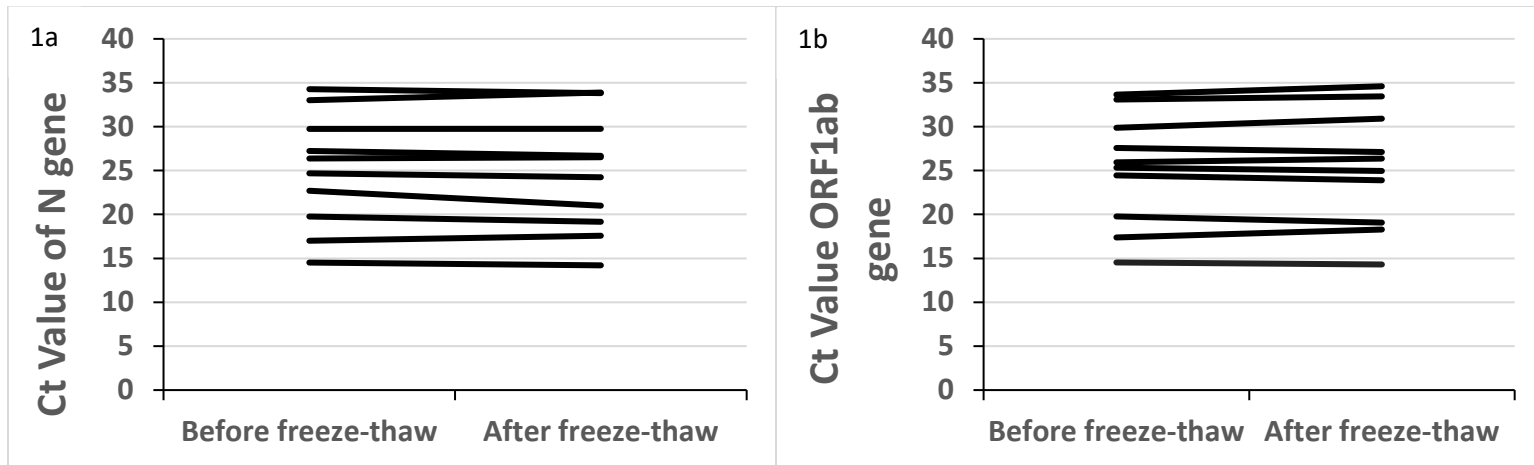

Supplemental Figure 1. Ct values of N gene (1a) and ORF1ab (1b) of 10 COVID-19 positive samples before and after one cycle of freeze-thaw.
